# Supplementary material for: Isolation and Identification of Antibacterial Bioactive Compounds From Bacillus megaterium L2
Source: PubMed Central journal article supplement (PMC8024468; doi:10.3389/fmicb.2021.645484), 2021-03-24
Supplement: Data_Sheet_1.pdf [file Data_Sheet_1.pdf]

Supplementary Materials

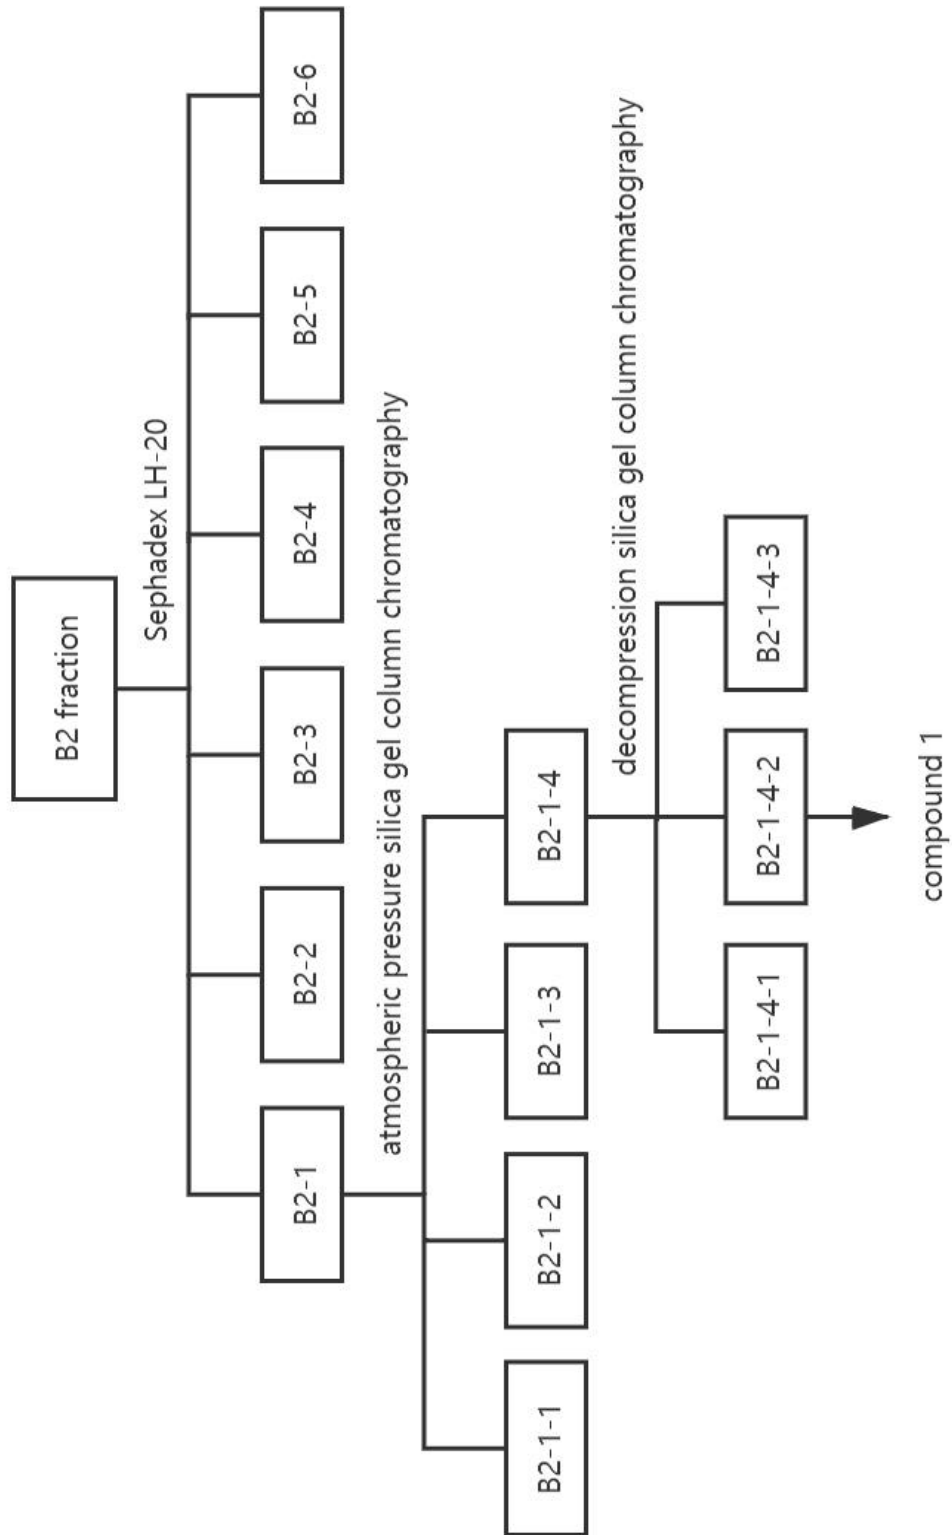

Supplementary Figure 1. The antibacterial activity guided fractionation of B2 fraction.

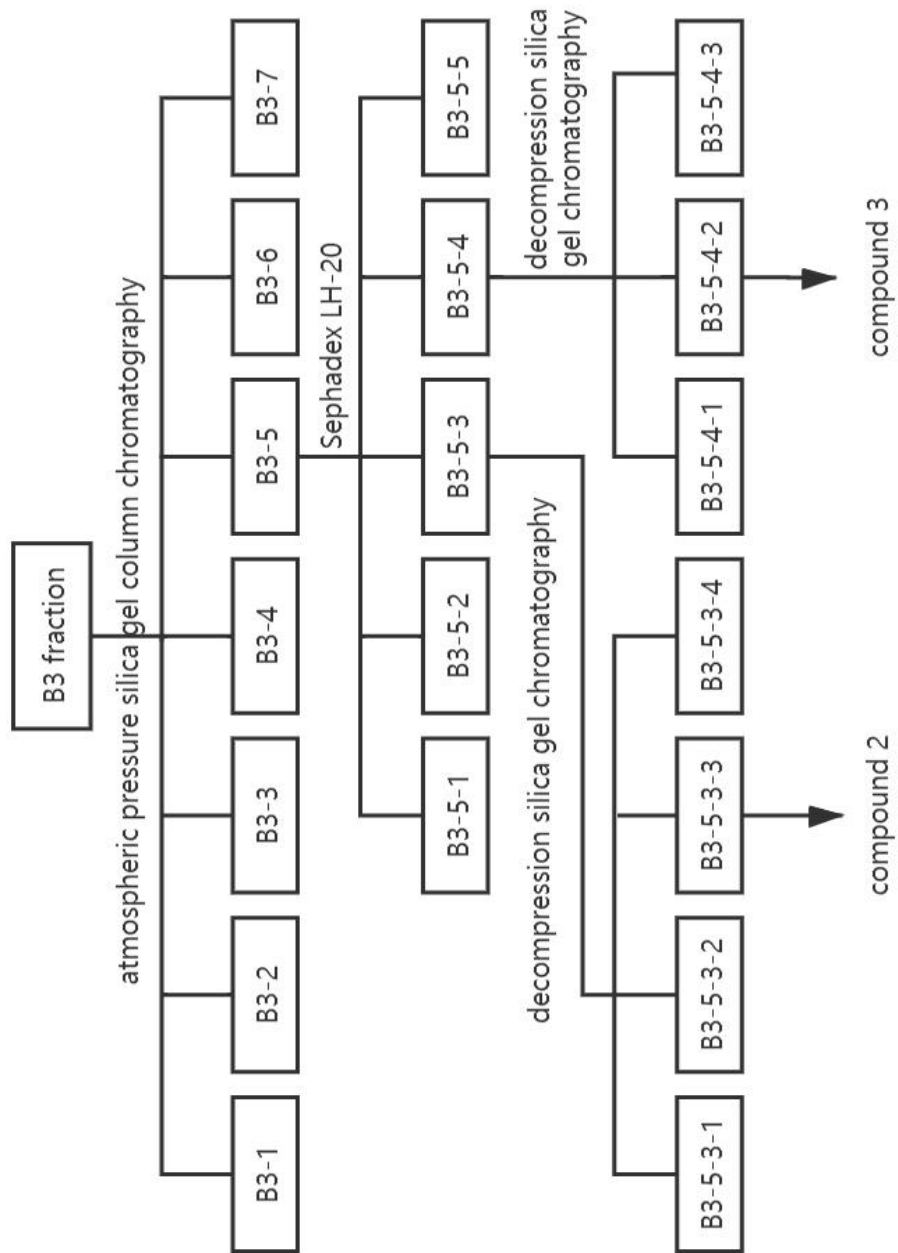

**Supplementary Figure 2.** The antibacterial activity guided fractionation of B3 fraction.

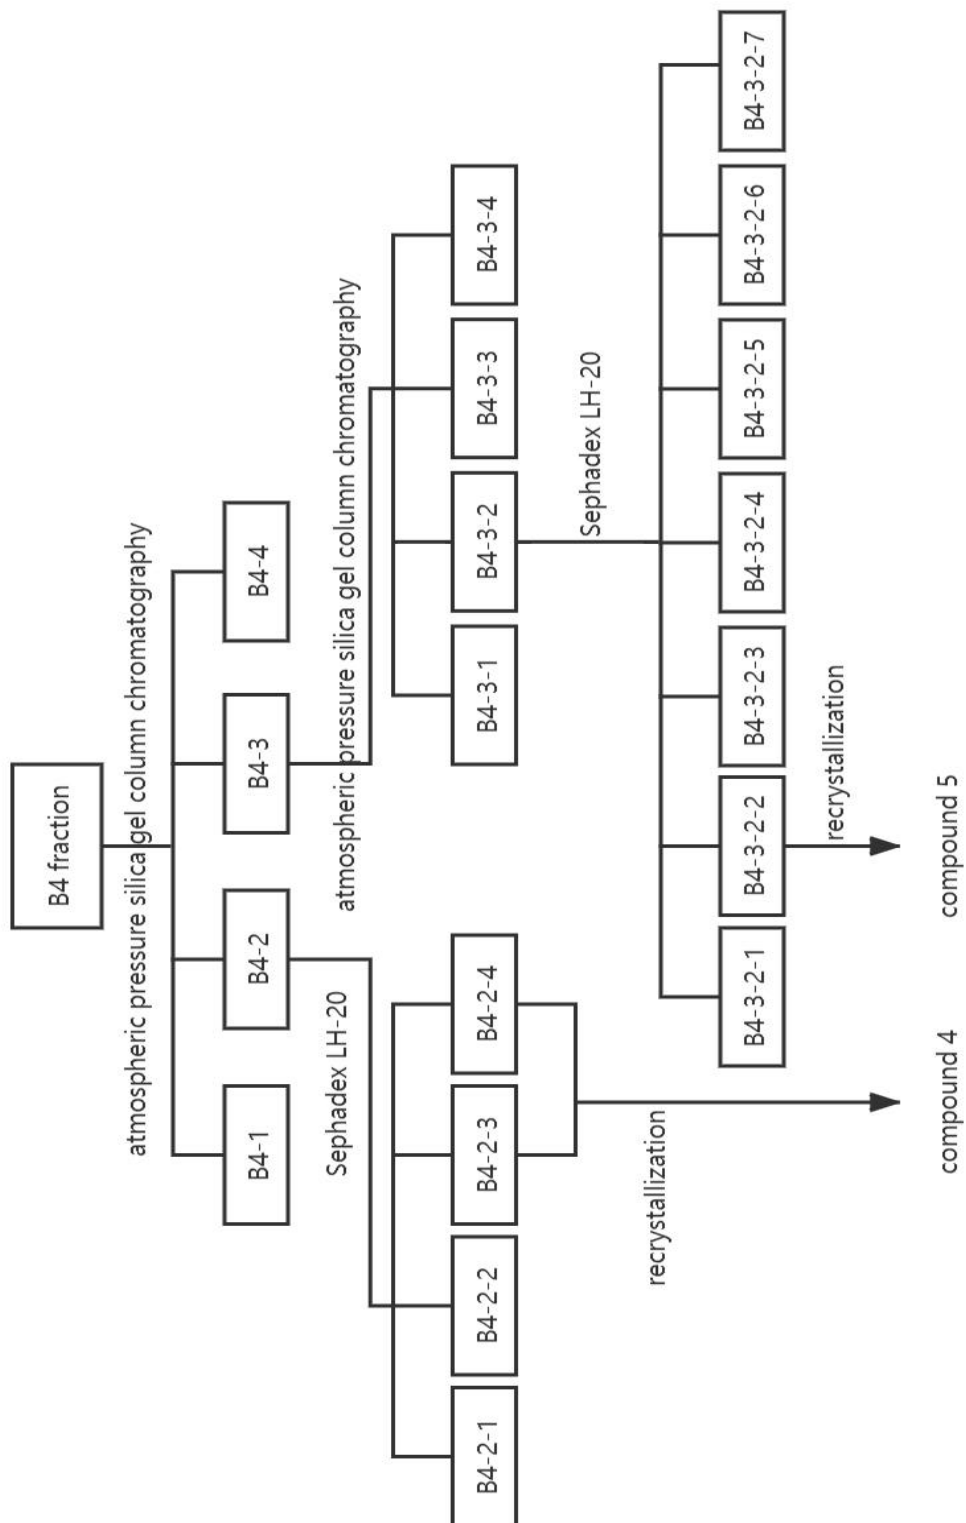

Suppleme

ntary Figure 3. The antibacterial activity guided fractionation of B4 fraction.

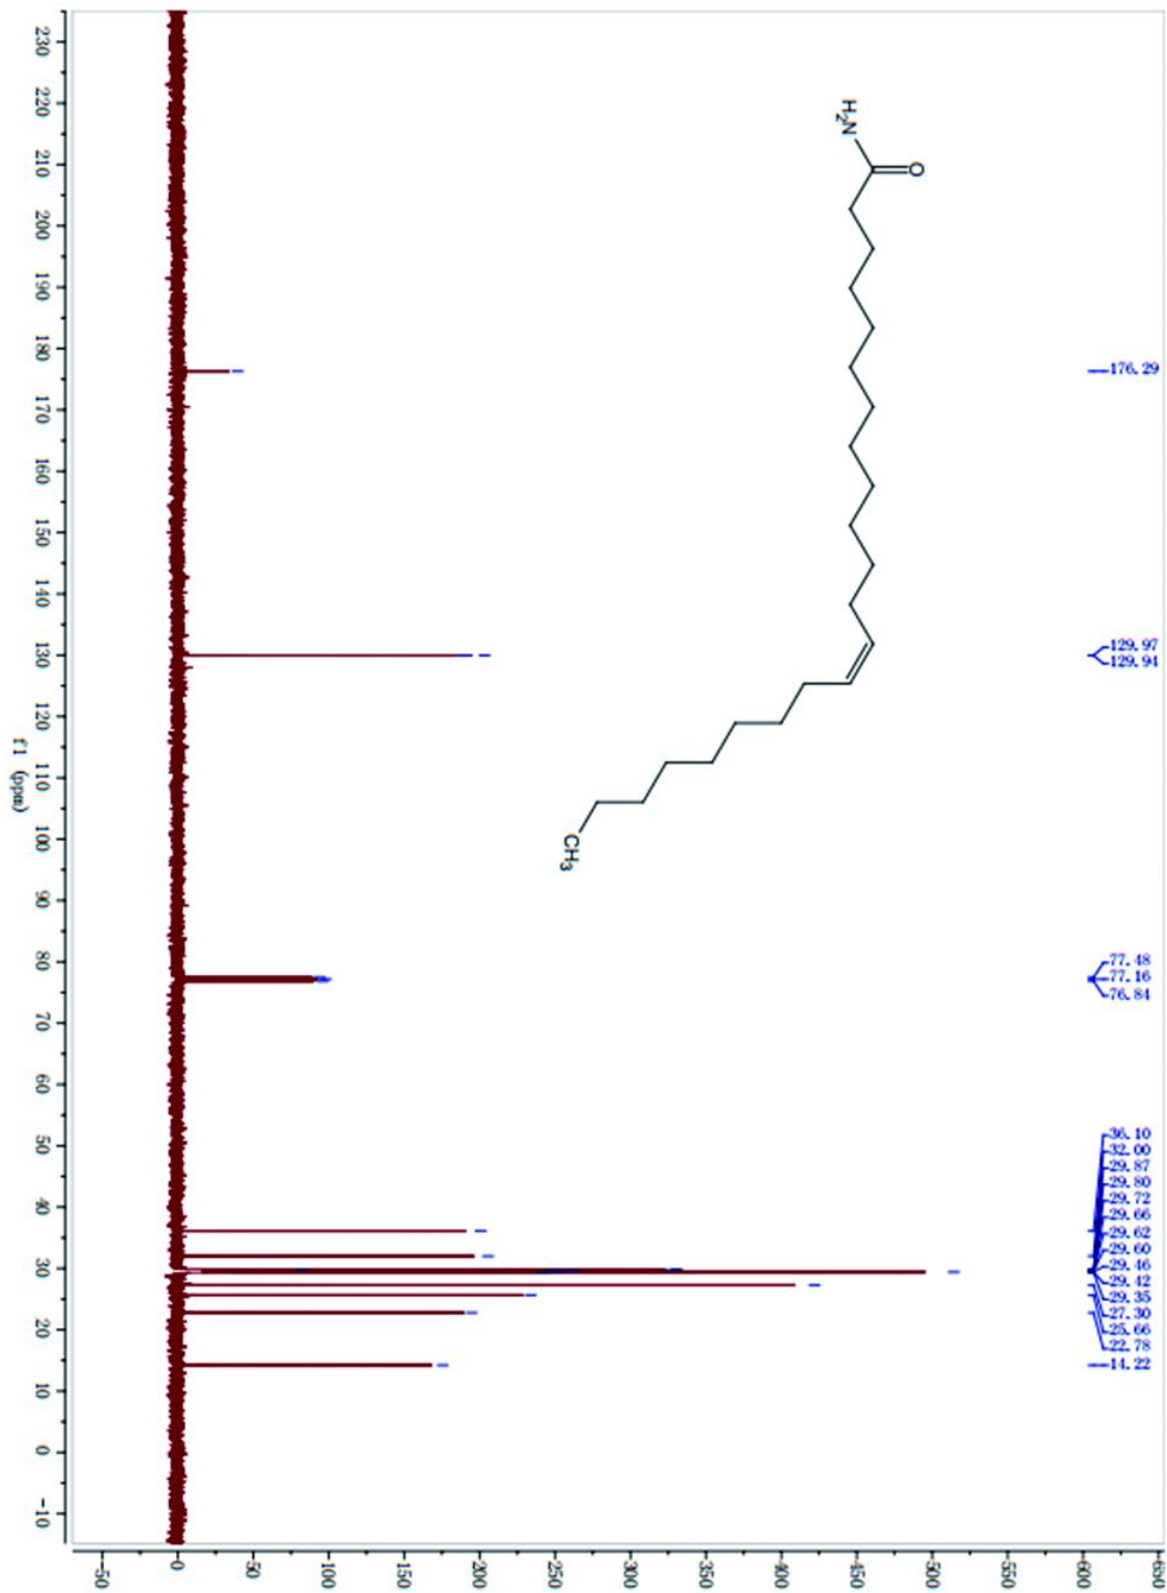

Supplementary Figure 4. The  $^{13}\text{C}$ -NMR spectrum of erucamide.

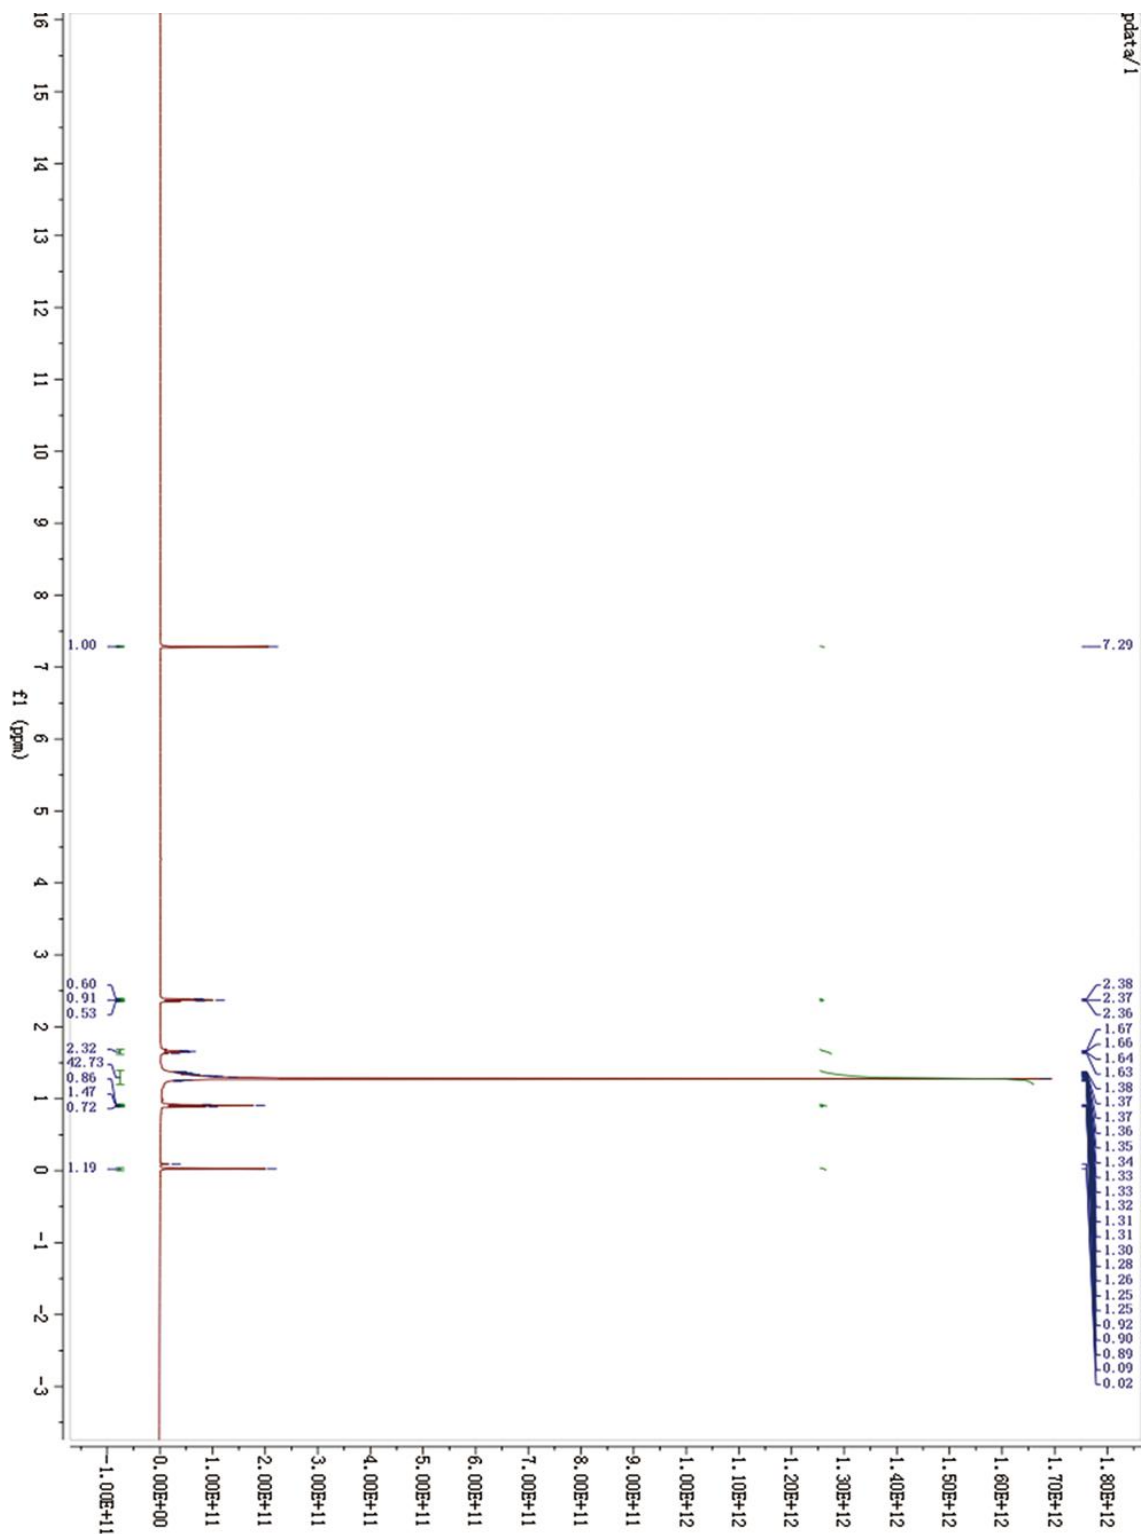

Supplementary Figure 5. The <sup>1</sup>H NMR spectrum of behenic acid.

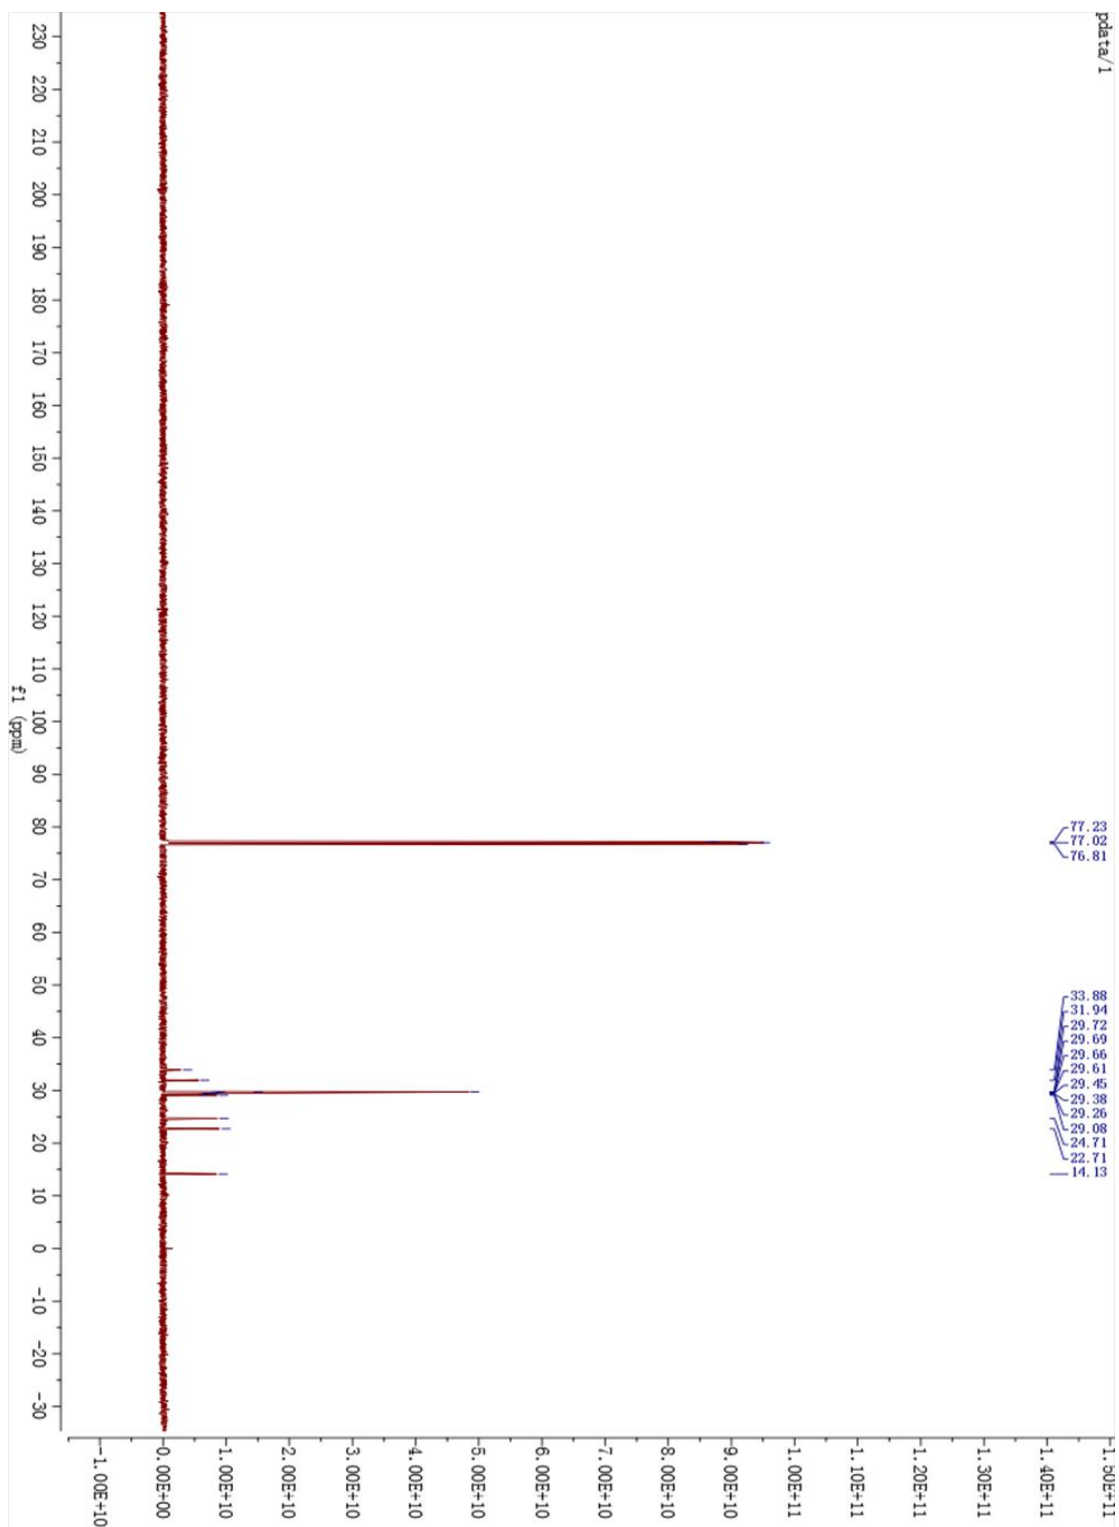

Supplementary Figure 6. The  $^{13}\text{C}$ -NMR spectrum of behenic acid.

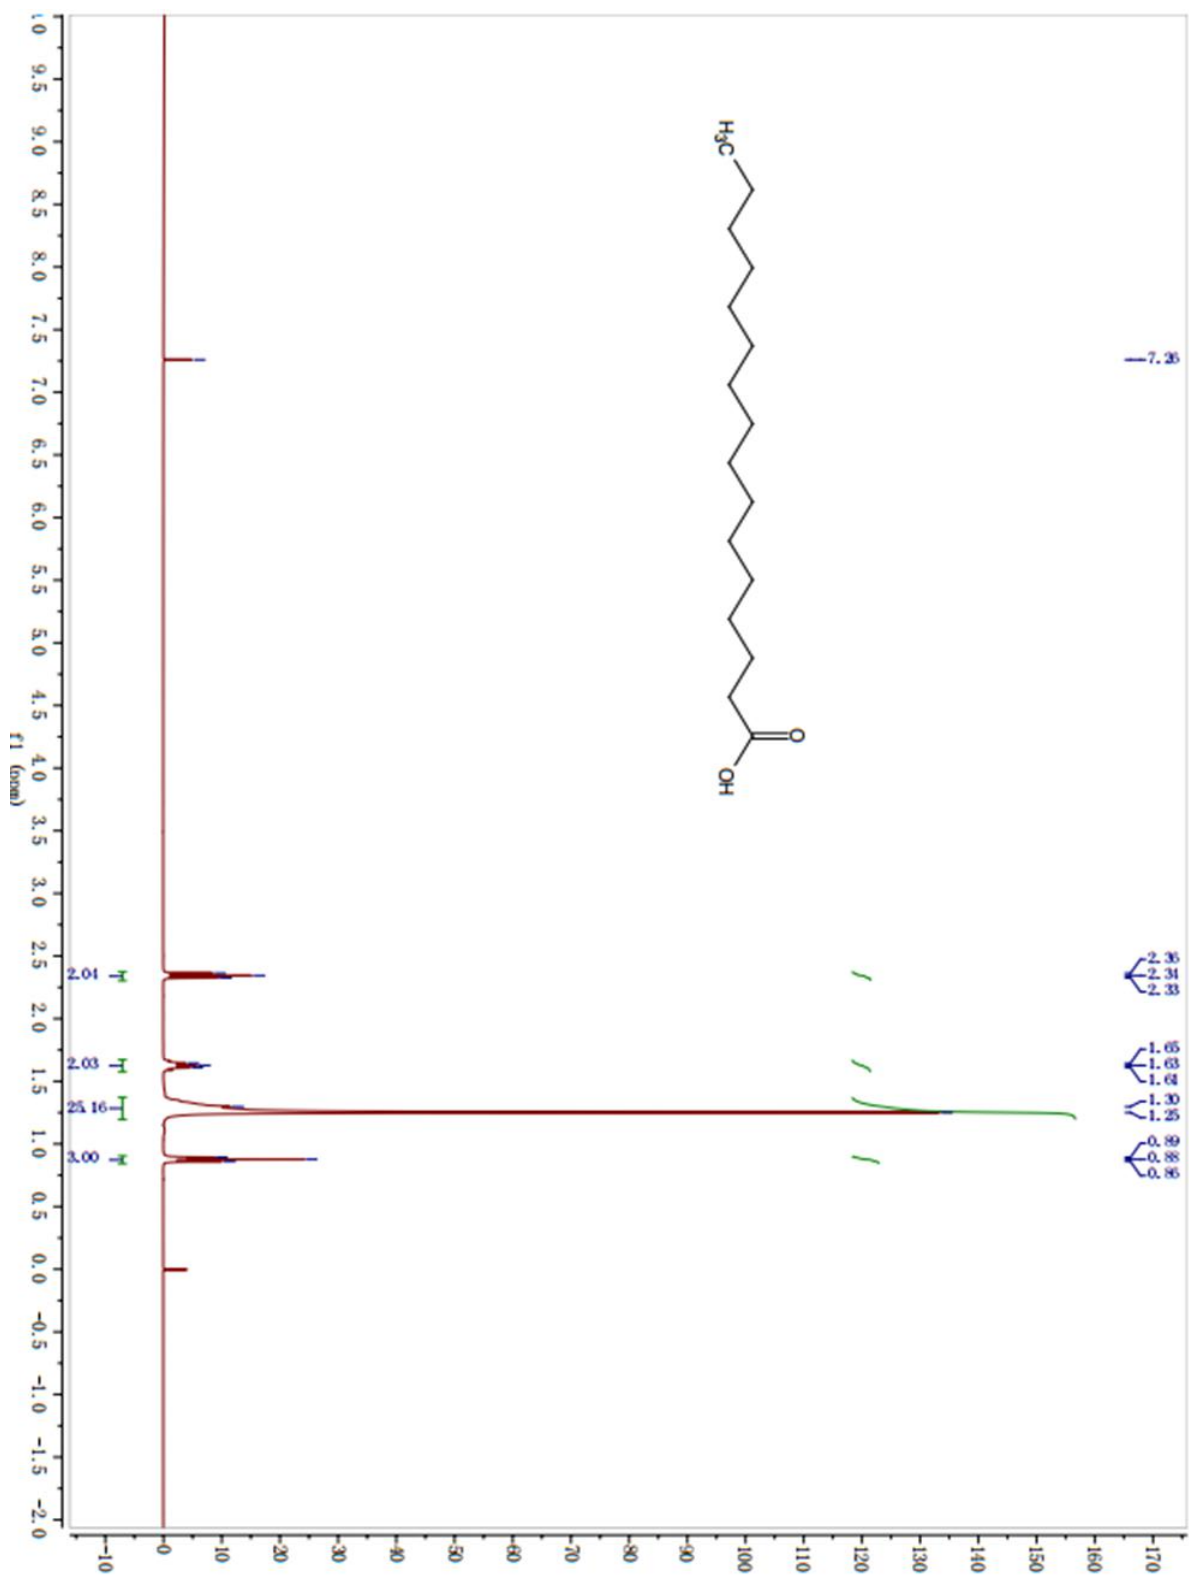

Supplementary Figure 7. The <sup>1</sup>H NMR spectrum of palmitic acid.

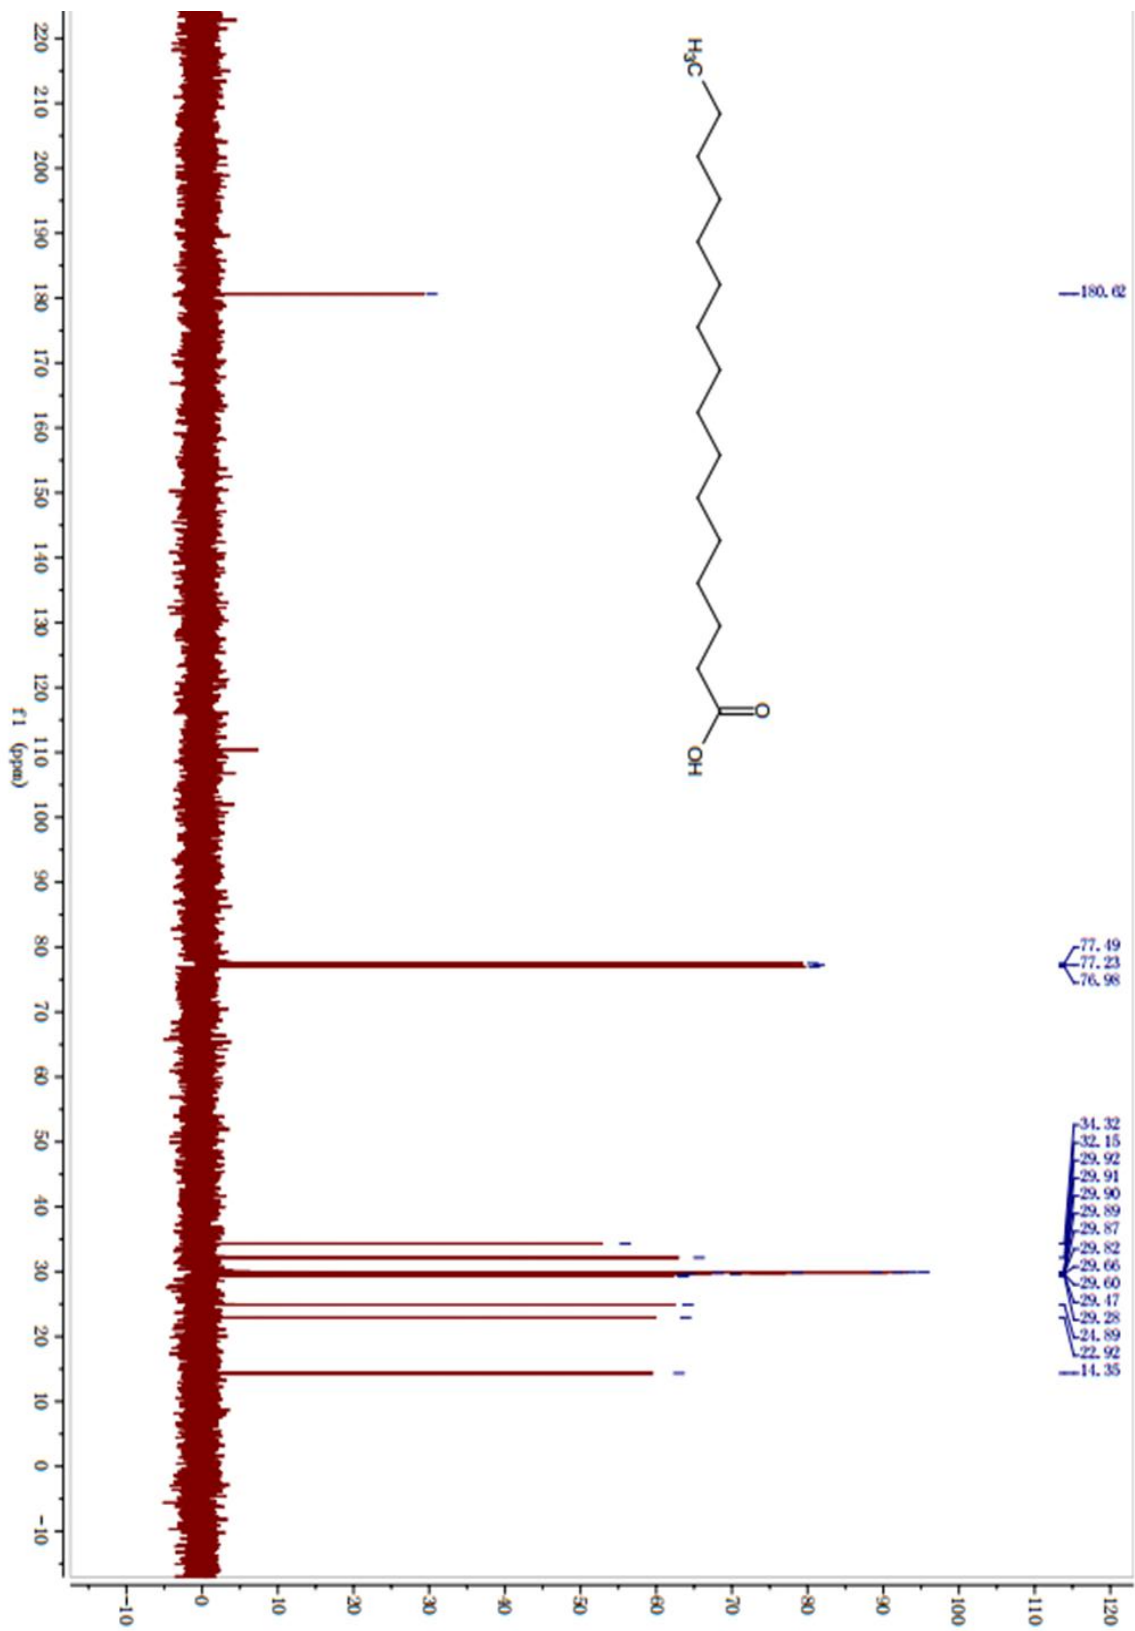

Supplementary Figure 8.  $^{13}\text{C}$ -NMR spectrum of palmitic acid.



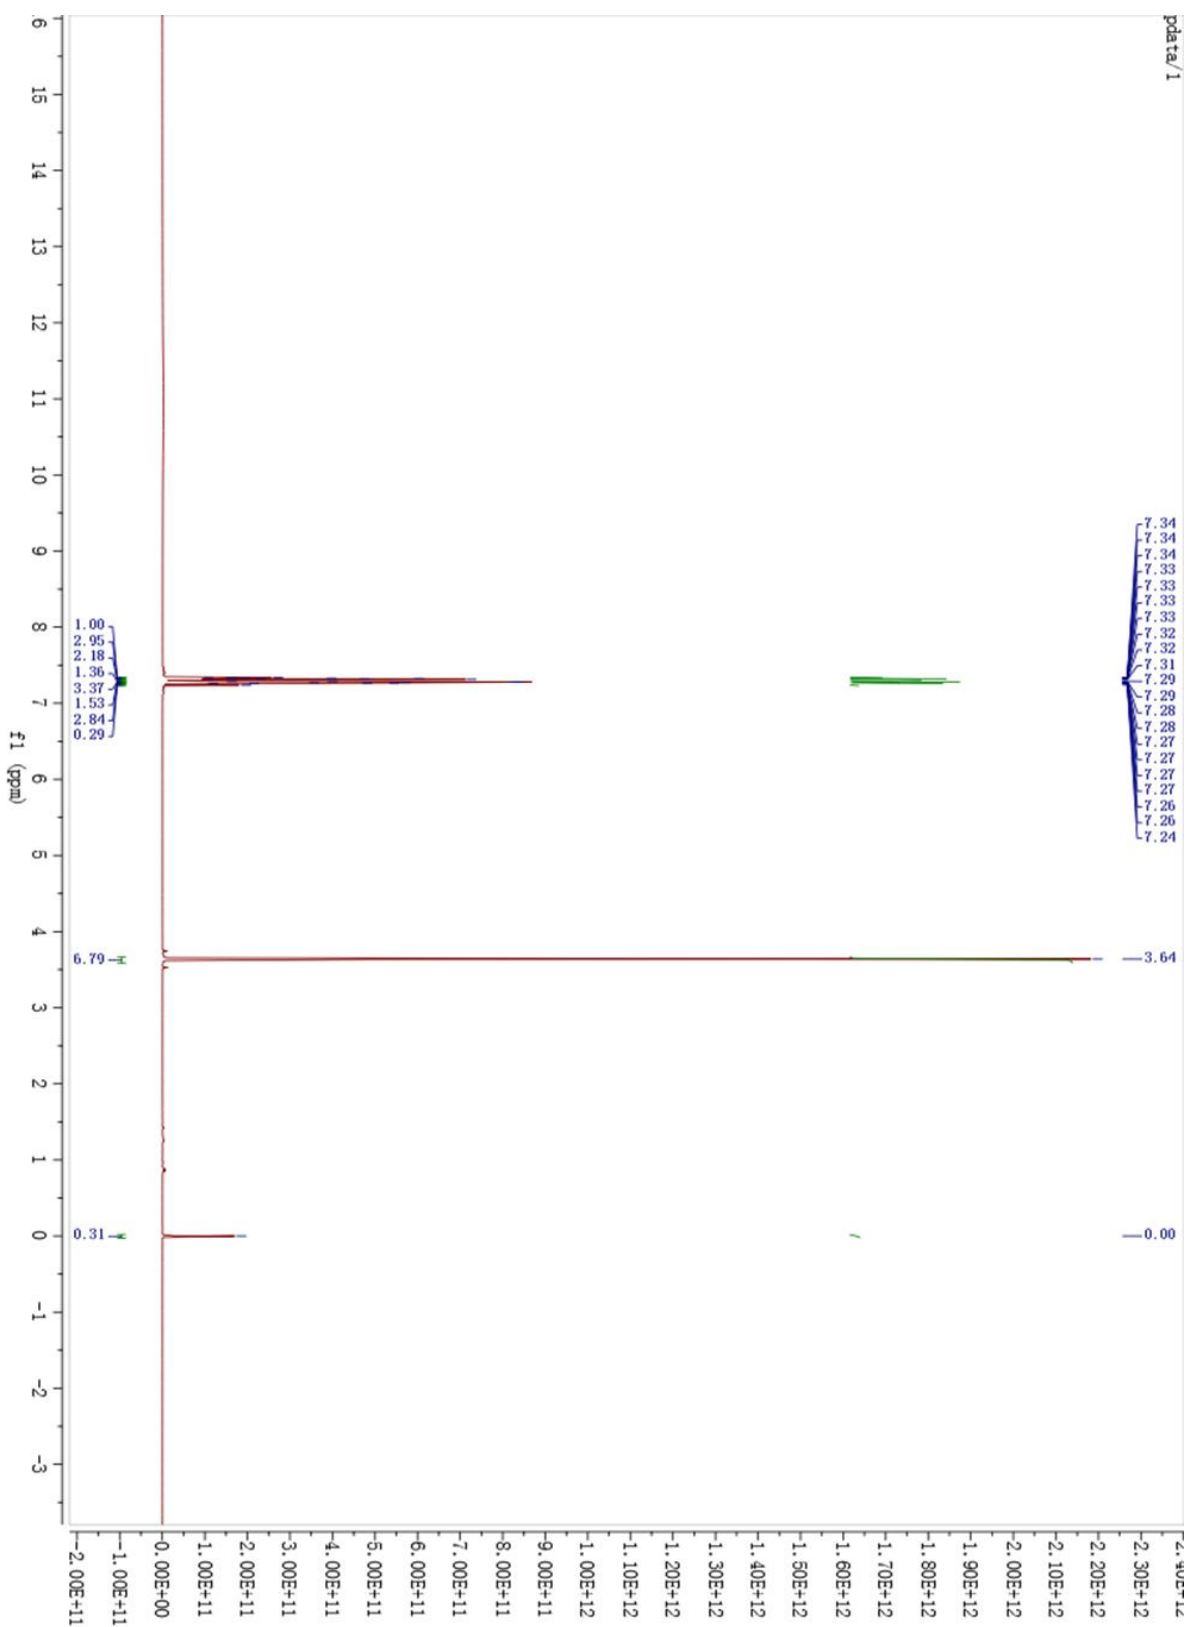

Supplementary Figure 9. The <sup>1</sup>H-NMR spectrum of phenylacetic acid.

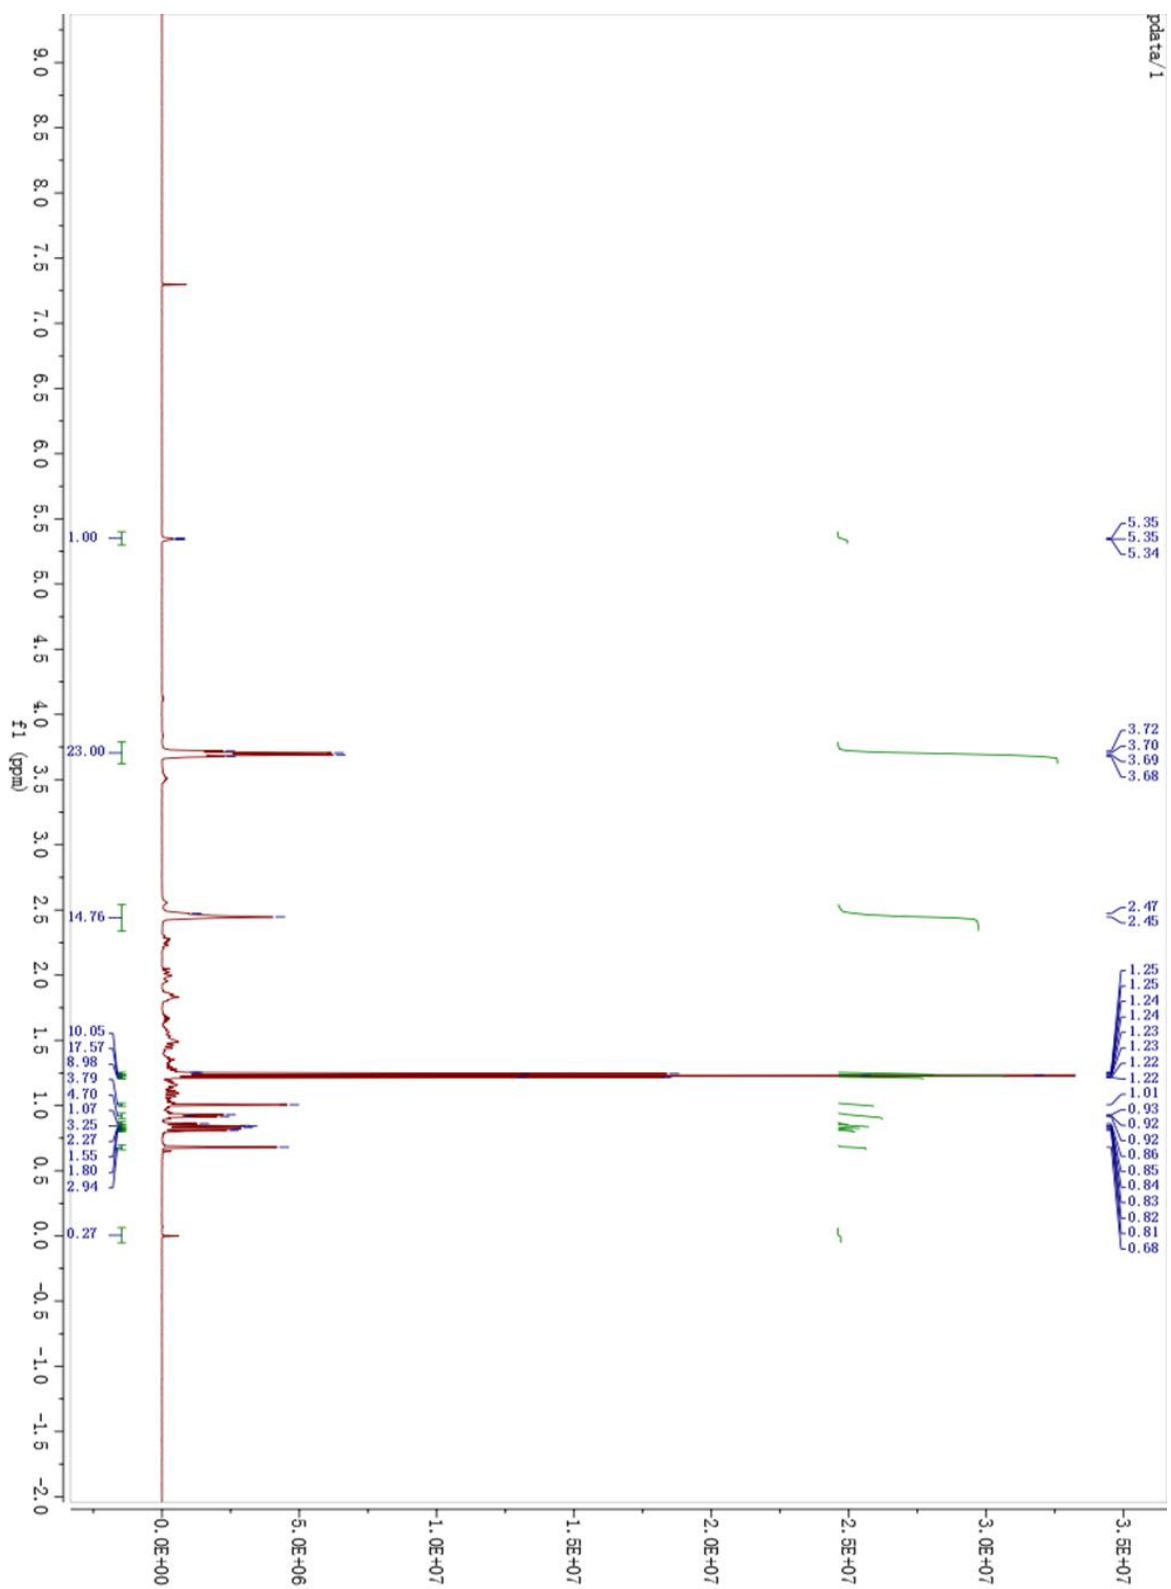

Supplementary Figure 10. The <sup>1</sup>H NMR spectrum of β-sitosterol.

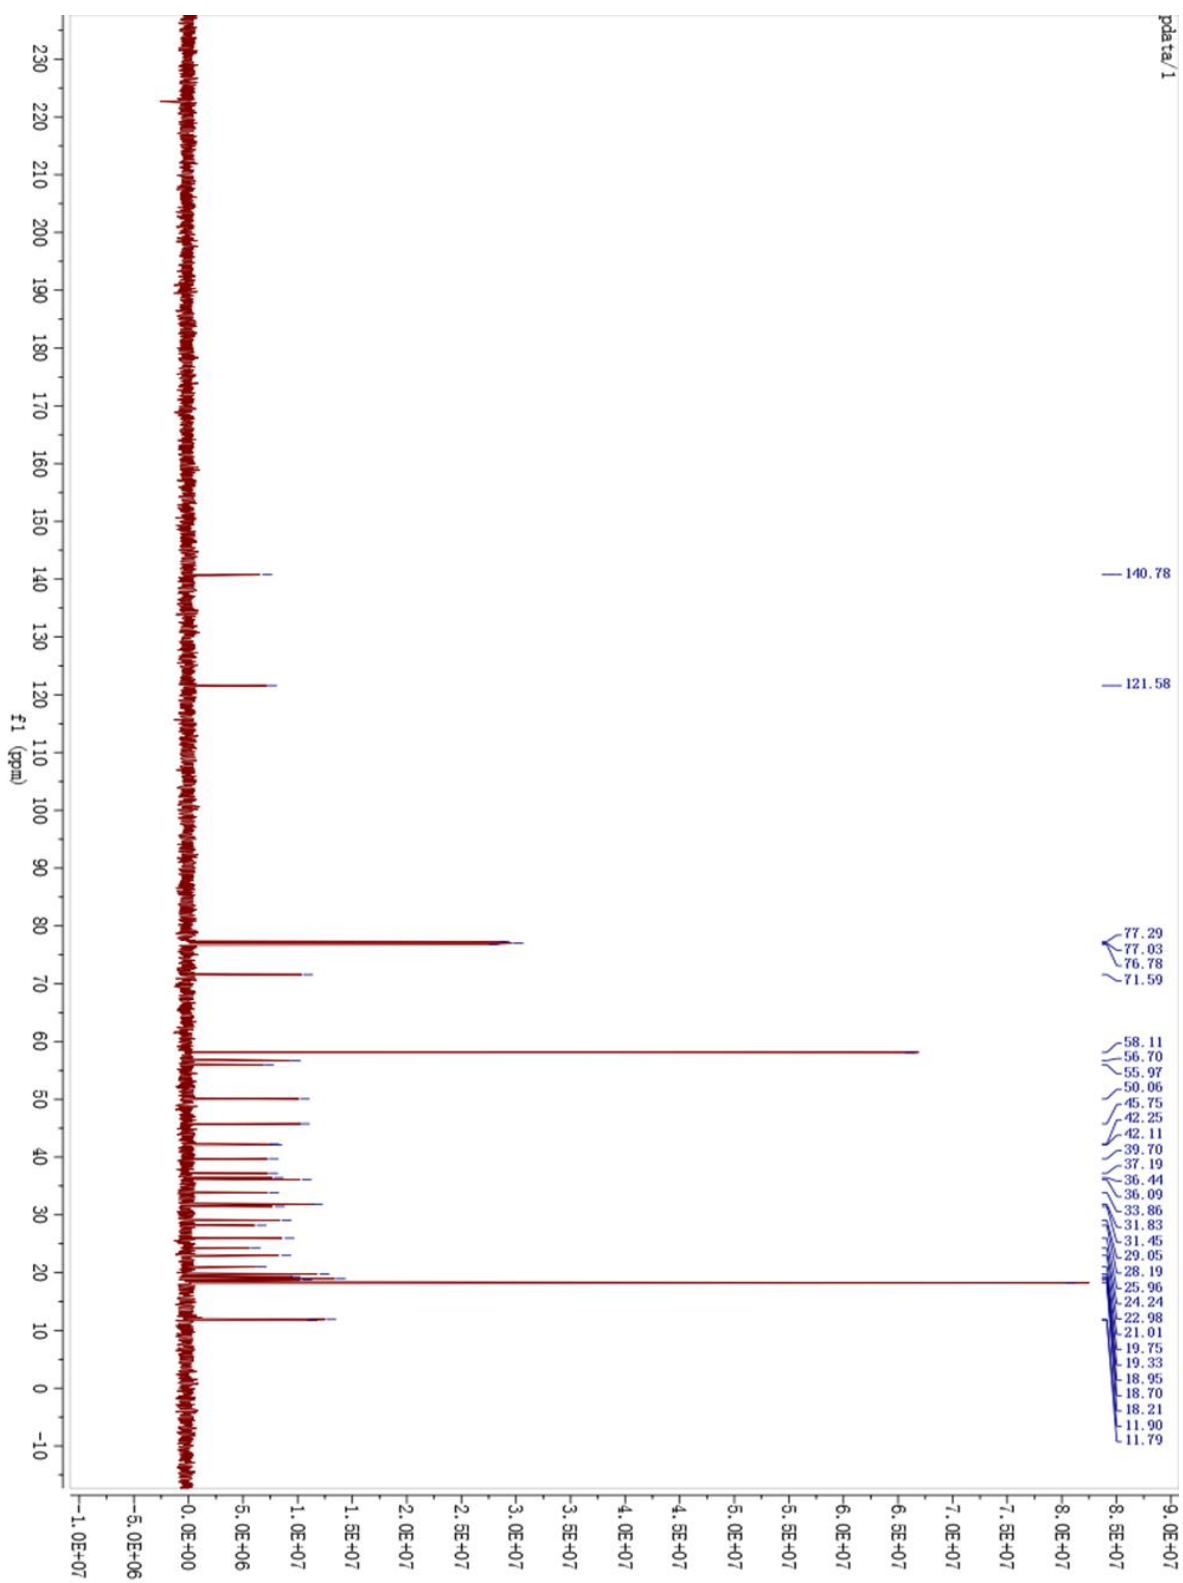

Supplementary Figure 11. The  $^{13}\text{C}$ -NMR spectrum of  $\beta$ -sitosterol.
